# Supplementary material for: Metal–organic framework-derived lilac flower-like CoNiZnO@nitrogen-doped carbon composites via a trapping microwave strategy for efficient absorption
Source: Royal Society of Chemistry journal article supplement (doi:10.1039/d4ta05222f), 2024-01-01
Supplement: d4ta05222f1.pdf [file d4ta05222f1.pdf]

## Supporting Information

### **Metal-organic frameworks-derived lilac flower-like CoNiZnO@nitrogen-doped carbon composites via trapping microwave strategy for efficient absorption**

Jiatong Yan<sup>1</sup>, Wenhao Bai<sup>2#</sup>, Ce Cui<sup>1</sup>, Shan Jiang<sup>1</sup>, Weijie Wang<sup>1</sup>, Hong Tang<sup>6</sup>,

Ronghui Guo<sup>1,3,4,5\*</sup>

1. College of Biomass Science and Engineering, Sichuan University, Chengdu 610065, China
2. Aviation Key Laboratory of Science and Technology on Structural Corrosion Prevention and Control, China Special Vehicle Research Institute, Jingmen 448035, China
3. Ministry Education Education Key Lab Leather Chemistry & Engineering, Sichuan University, Chengdu 610065, Sichuan, China
4. Yibin Industrial Technology Research Institute, Sichuan University, Yibin, Sichuan, China
5. High-Tech Organic Fibers Key Laboratory of Sichuan Province, Chengdu, Sichuan
6. Graduate School of Energy Science, Kyoto University, Japan

---

# Equal contribution

\*Corresponding Author. Ronghui Guo, E- mail address: ronghuiguo214@126.com (R. H. Guo)

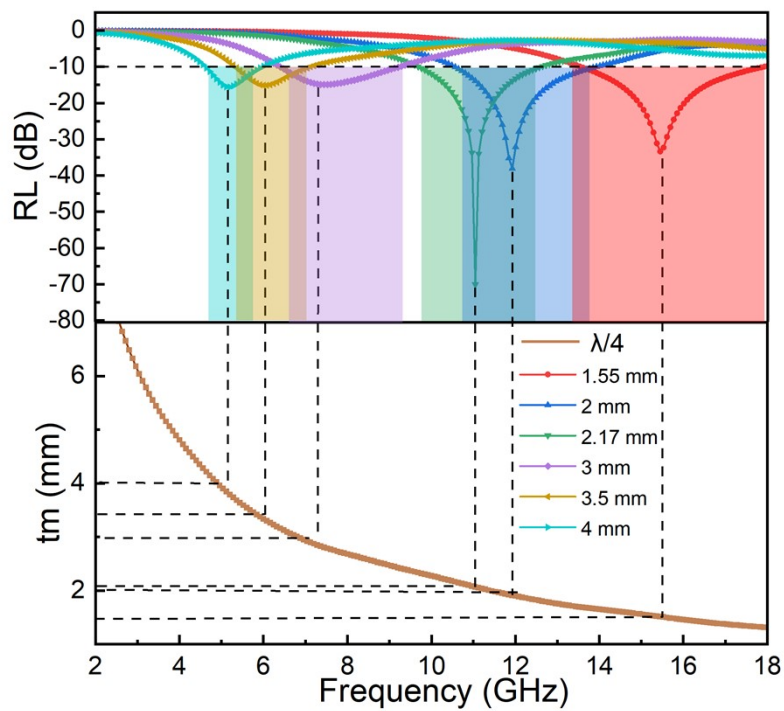

**Fig. S1** Dependence of the matching thickness ( $t_m$ ) on frequency ( $f_m$ ) under  $\lambda/4$  of CoNiZnO@NC-30.

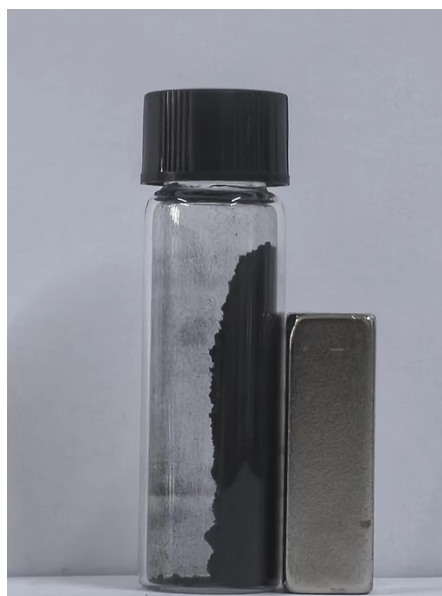

**Fig. S2** Photo of a magnet attracting CoNiZnO@NC-30.

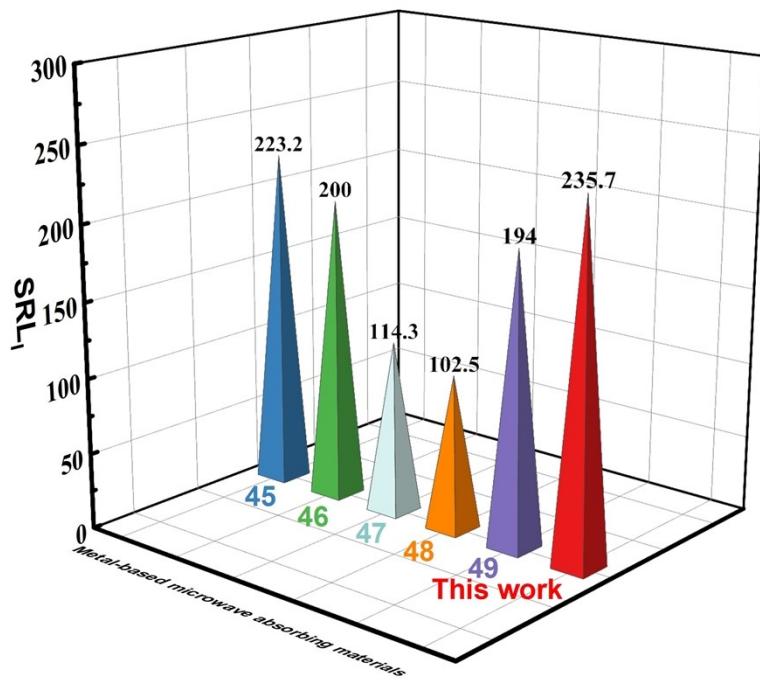

**Fig. S3** SRL<sub>1</sub> of CoNiZnO@NC-30 composite and the metal-based microwave absorbing materials reported in recent years.

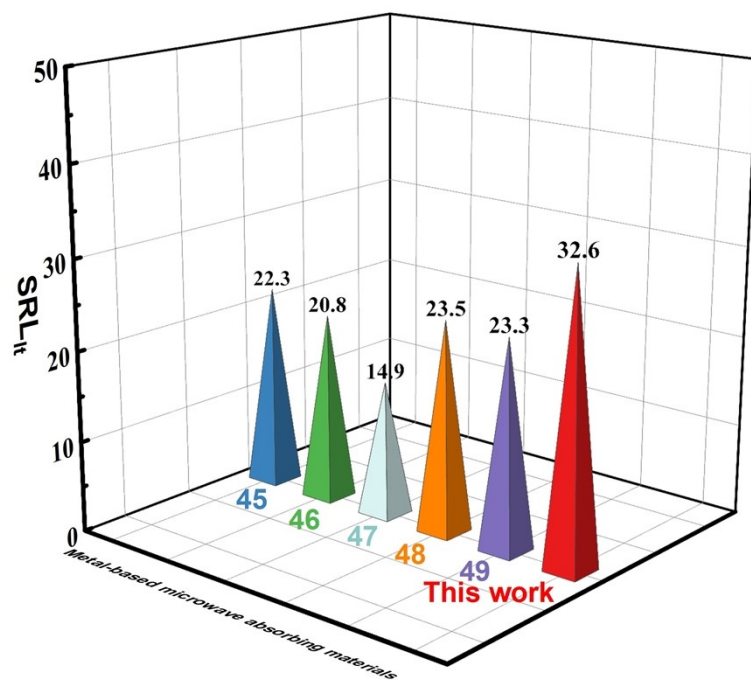

**Fig. S4** SRL<sub>lt</sub> of CoNiZnO@NC-30 composite and the metal-based microwave absorbing materials reported in recent years.

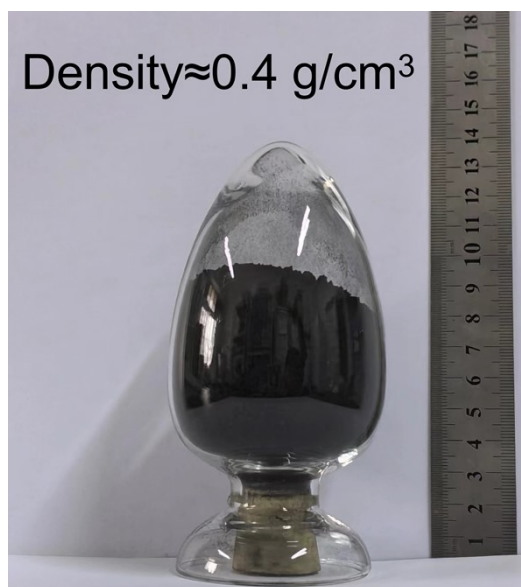

**Fig. S5** Photo of CoNiZnO@NC-30 composite.

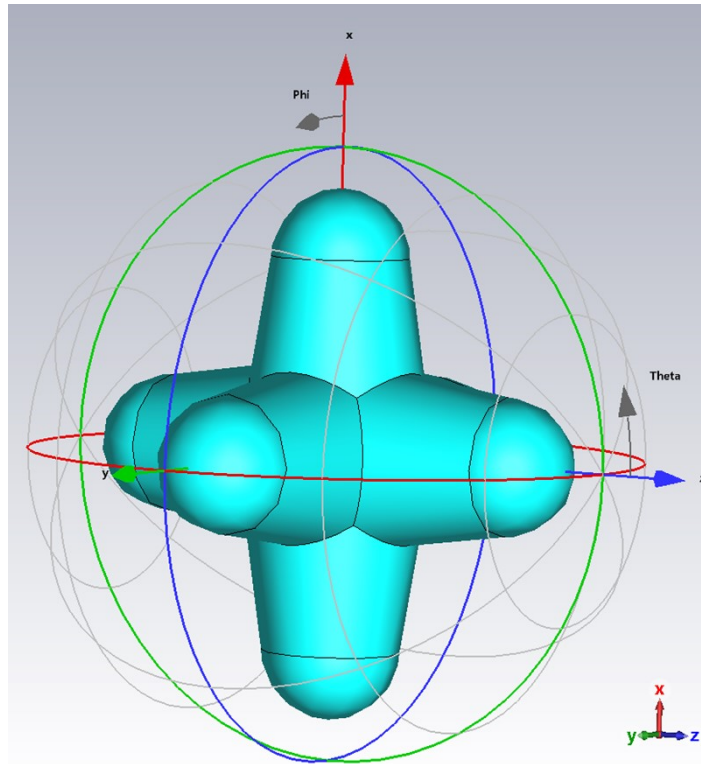

**Fig. S6** The three-dimensional model diagram of lilac flower-like CoNiZnO@NC.

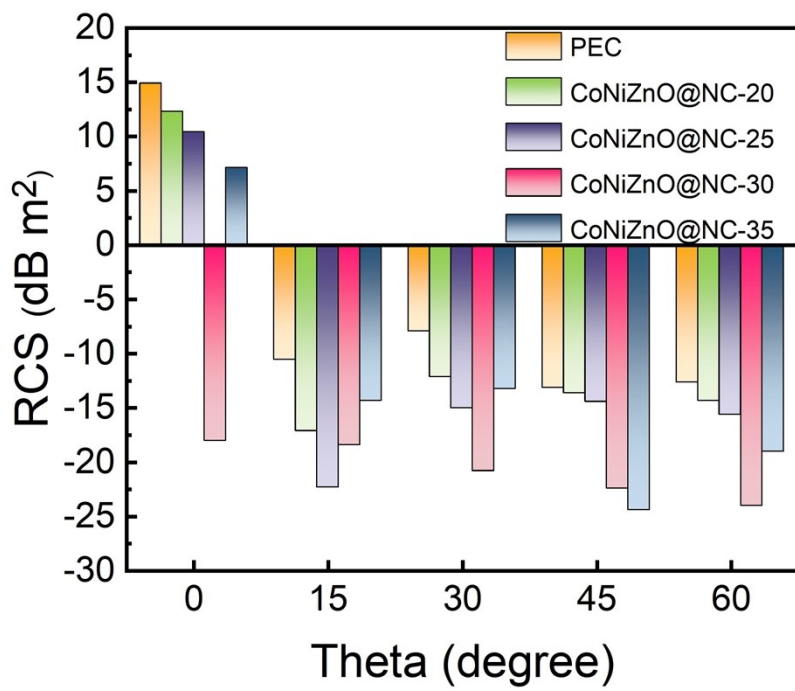

**Fig. S7** RCS values of CoNiZnO@NC composites in the angle of 0°, 15°, 30°, 45°, and 60°.

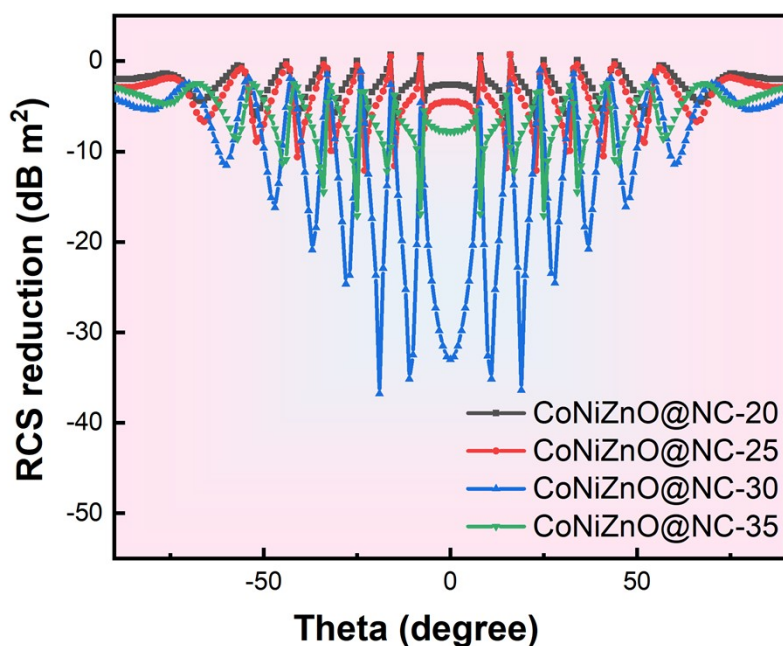

**Fig. S8** RCS reduction between CoNiZnO@NC composites and PEC.

**Table S1** Comparison of metal-based microwave absorbing materials with CoNiZnO@NC-30 composite.

| Samples | Thickness (mm) | RL <sub>min</sub> (dB) | EAB(GHz) | Filling amount |
|---------|----------------|------------------------|----------|----------------|
| [1]     | 2.5 mm         | -55.8 dB               | 4.1 GHz  | 25%            |
| [2]     | 2.4 mm         | -50.0 dB               | 4.3 GHz  | 25%            |
| [3]     | 2.3 mm         | -34.3 dB               | 3.3 GHz  | 30%            |
| [4]     | 2.4 mm         | -56.4 dB               | 4.0 GHz  | 55%            |
| [5]     | 2.5 mm         | -58.2 dB               | 4.0 GHz  | 30%            |

---

|           |         |          |          |     |
|-----------|---------|----------|----------|-----|
| This work | 2.17 mm | -70.7 dB | 4.48 GHz | 30% |
|-----------|---------|----------|----------|-----|

---

## References

- [1] R. Shu, W. Li, Y. Wu, J. Zhang and G. Zhang, *Chem. Eng. J.*, 2019, **362**, 513-524.
- [2] L. Wang, X. Yu, X. Li, J. Zhang, M. Wang and R. Che, *Chem. Eng. J.*, 2020, **383**, 123099.
- [3] F. Wu, L. Wan, Q. Li, Q. Zhang and B. Zhang, *Compos. Part. B-Eng.*, 2022, **236**, 109839.
- [4] K. Yang, Y. Cui, L. Wan, Q. Zhang and B. Zhang, *Carbon*, 2022, **190**, 366-375.
- [5] Y. Zhao, W. Wang, J. Wang, J. Zhai, X. Lei, W. Zhao, J. Li, H. Yang, J. Tian and J. Yan, *Carbon*, 2021, **173**, 1059-1072.
